# Supplementary material for: Modification of protein structures by altering the whey protein profile and heat treatment affectsin vitrostatic digestion of model infant milk formulas
Source: Royal Society of Chemistry journal article supplement (doi:10.1039/d0fo01362e), 2020-01-01
Supplement: d0fo01362e4.pdf [file d0fo01362e4.pdf]

## Supplementary figure caption

**Supplementary figure 1.** Confocal laser scanning microscopy images at a magnification of x 63 of the unheated control IMF (A), the unheated LF<sup>+</sup> α-LA<sup>+</sup> IMF (B) and the heated LF<sup>+</sup> α-LA<sup>+</sup> IMF at 80°C (C) at the end of the *in vitro* gastric digestion.

Proteins, in white, were colored with Fast Green.

**Supplementary figure 2.** Particle size distribution of pancreatin, as determined by laser light scattering.

The pancreatin solution was prepared to a same amount than that of the intestinal samples
