# Supplementary figures and images for: Modification of protein structures by altering the whey protein profile and heat treatment affectsin vitrostatic digestion of model infant milk formulas
Source: Royal Society of Chemistry journal article supplement (doi:10.1039/d0fo01362e), 2020-01-01

## Supplementary Figure 1

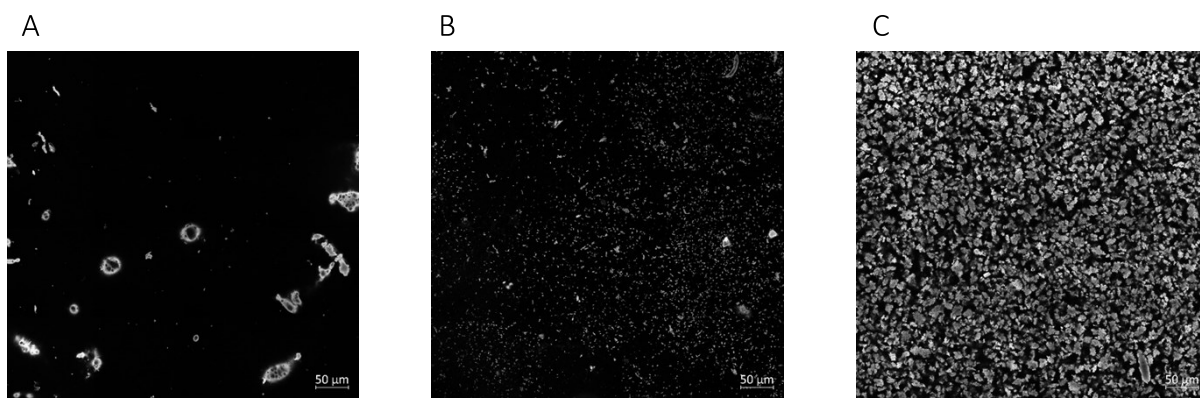

Supplement: d0fo01362e2.pdf [file d0fo01362e2.pdf]

## Supplementary Figure 2

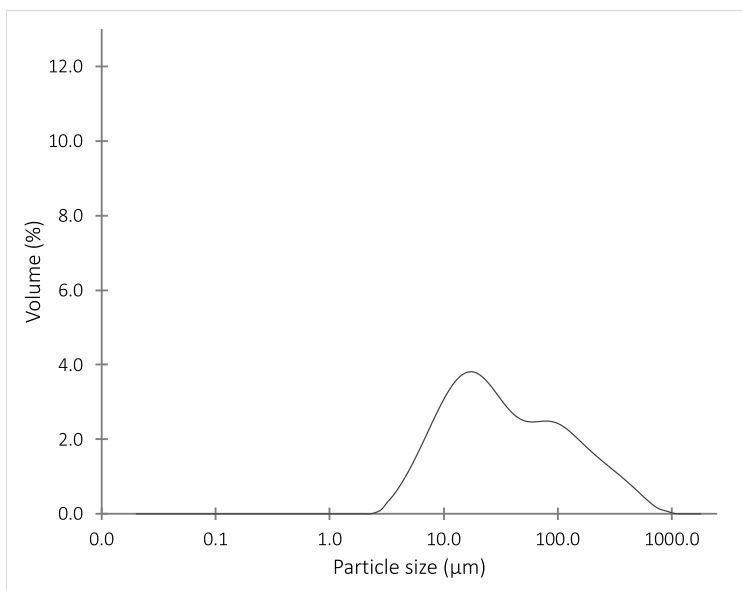

Supplement: d0fo01362e3.pdf [file d0fo01362e3.pdf]
